# Supplementary material
Source: Elsevier journal article supplement (https://www.sciencedirect.com/science/article/pii/S2173507720302040)
Supplement: mmc1 [file S2173507720302040:mmc1.docx]

**ENCUESTA PREVENCIÓN ETV**

**Asociación Español de Cirujanos**

1. ¿Qué capacidad de camas tiene su hospital?

- Menos de 200 camas
- 200-500 camas
- Más de 500 camas

1. ¿Es su hospital docente?

- Si, para pregraduados (alumnos) y postgraduados (MIR)
- Si, solo para postgraduados (MIR)
- No tiene docencia

1. ¿Cuántos años tiene de experiencia como especialista en cirugía?

- Soy MIR
- Menos de 5 años
- 5-10 años
- 10-20 años
- Más de 20 años

1. ¿Considera que en su especialidad existe una cono cimiento adecuado acerca de la prevención de la Enfermedad Tromboembólica Venosa (ETV) postoperatoria¿

- Si
- No

1. ¿Considera que su nivel de conocimiento acerca de la prevención de la ETV es?

- Bajo
- Adecuado
- Alto

1. ¿Cree que necesita usted mayor formación al respecto?

- Si
- No

1. En su opinión, la ETV representa en su práctica clínica un problema:

- Mínimo
- Moderado
- Importante

1. En su servicio, ¿quién decide la realización y el tipo de la tromboprofilaxis de la ETV?

- Cirugía
- Anestesia
- Hematología
- Una comisión creada al respecto
- Otros (especificar): …………………………..

1. En su práctica clínica diaria, ¿cuáles son las intervenciones quirúrgicas más comunes? (indique las tres más frecuentes)

- Cirugía digestiva en general
- Cirugía de pared
- Cirugía colorrectal
- Cirugía laparoscópica
- Cirugía bariátrica
- Cirugía endocrina
- Otros (especificar): …………….

1. ¿Existe en su servicio un protocolo definido para la prevención de la ETV?

- No
- Si

1. En su hospital, ¿existe una comisión de trombosis?

- No
- Si
- Lo desconozco

1. ¿Utiliza habitualmente alguna medida para la prevención de la ETV post operatoria, aparte de deambulación temprana?

- No
- Si

1. Si es NO, ¿Cuál es la razón o razones fundamentales?

- La incidencia de ETV es muy baja según mi experiencia
- Las diferentes modalidades de profilaxis no son realmente efectivas
- Riesgos de complicaciones secundarias al uso de anticoagulantes
- Coste económico de la profilaxis
- Otra (especificar): ……………………..

1. Si es SI, ¿Qué métodos son los que habitualmente utiliza para la profilaxis antitrombótica perioperatoria?

- Vendajes elásticos
- Medias elásticas
- Métodos de compresión mecánica neumática intermitente
- Heparinas de bajo peso molecular
- Aspirina
- Anticoagulante oral (acenocumarol, apixabán, rivaroxabán, dabigatrán,…)
- HNF (Heparina No Fraccionada)
- Otros: (especificar) ………..

1. Por favor, valore asigne una valor a cada característica de los siguientes métodos profilácticos (1 poco de acuerdo y 5 muy de acuerdo):

|  | HNF | HBPM | ACO | Medias | CNI |
| --- | --- | --- | --- | --- | --- |
| Seguridad |  |  |  |  |  |
| Eficacia |  |  |  |  |  |
| Sencillez uso |  |  |  |  |  |
| Coste-efectividad |  |  |  |  |  |

HNF: heparina no fraccionada

HBPM: heparina de bajo peso molecular

ACO: anticoagulantes orales (acenocumarol, apixabán, rivaroxabán, dabigatrán)

CNI: compresión neumática intermitente

1. Si estuviera considerando el realizar profilaxis en un paciente concreto, ¿qué tres factores de riesgos considera más determinantes?

- Duración de la intervención
- Edad avanzada
- Eventos tromboembólicos previos
- Cirugía pélvica
- Cáncer
- Obesidad
- Hipercoagulabilidad o trombofilia conocidas
- Venas varicosas
- Previsión de inmovilización
- Abordaje laparoscópico
- Otros (especificar): ………………..

1. A continuación, le agradeceríamos que nos indicase, cuál sería su elección para la tromboprofilaxis en los siguientes casos clínicos:

(Dosis diaria de riesgo moderado: Enoxaparina 2.000 UI (20 mg), Bemiparina 2.500 UI, y el resto de HBPM < 3.500 UI

Dosis diaria de alto riesgo: Enoxaparina 4.000 UI (40 mg), Bemiparina 3.500 UI, resto ≥ 3.500 UI)

A.- Mujer de 57 años, que pesa 65 Kg (BMI 28 Kg/m2) sin antecedentes destacables, que se va a someter a colecistectomía laparoscópica.

- HBPM a dosis de riesgo moderado, empezado 2 horas antes
- HBPM a dosis de riesgo moderado, empezado 10-12 horas antes
- HBPM a dosis de riesgo alto, empezado 2 horas antes
- HBPM a dosis de riesgo alto, empezado 10-12 horas antes
- HBPM a dosis de riesgo moderado, empezado después de la intervención
- HBPM a dosis de riesgo alto, empezado después de la intervención

A1.-En el caso anterior, ¿Utilizaría algún método mecánico además de la HBPM?

- - Medias elásticas profilácticas (15-25 mm Hg en el tobillo)
  - Medias elásticas terapéuticas (30-40 mm Hg en el tobillo)
  - Compresión neumática intermitente
  - Vendaje elástico
  - No creo indicado ningún método físico en este caso

A2.-La paciente anterior evoluciona favorablemente y puede irse de alta en el primer día postoperatorio. ¿Cuánto tiempo mantendría la profilaxis farmacológica en este caso?

- - Hasta el día del alta
  - Durante una semana tras la intervención
  - Durante 2 semanas tras la intervención
  - Durante 4 semanas tras la intervención

B.- Mujer de 49 años, que pesa 120 Kg (BMI 42 Kg/m2), con diabetes e insuficiencia venosa crónica en miembros inferiores, que se va a someter a tubulización gástrica por vía laparoscópica. Decide usar una HBPM, ¿Qué protocolo usaría?

- HBPM 3500-4000 UI/24h durante 7-14 días
- HBPM 5000-8000 UI/24h durante 7-14 días
- HBPM 3500-4000 UI/12h durante 7-14 días
- HBPM 3500-4000 UI/24h durante 3-4 semanas
- HBPM 3500-4000 UI/12h durante 3-4 semanas

B1.- En el caso anterior, ¿Utilizaría algún método mecánico además de la HBPM?

- - Medias elásticas profilácticas (15-25 mm Hg en el tobillo)
  - Medias elásticas terapéuticas (30-40 mm Hg en el tobillo)
  - Compresión neumática intermitente
  - Vendaje elástico
  - No creo indicado ningún método físico en este caso

B2.- La paciente anterior evoluciona favorablemente y puede irse de alta en el tercer día postoperatorio. ¿Cuánto tiempo mantendría la profilaxis farmacológica en este caso?

- - Hasta el día del alta
  - Durante una semana tras la intervención
  - Durante 2 semanas tras la intervención
  - Durante 4 semanas tras la intervención

C.- Varón de 74 años, obeso (IMC de 32 Kg/m2), que va a ser intervenido por sufrir un adenocarcinoma en sigma por vía laparoscópica.

- HBPM a dosis de riesgo moderado, empezado 2 horas antes
- HBPM a dosis de riesgo moderado, empezado 10-12 horas antes
- HBPM a dosis de riesgo alto, empezado 2 horas antes
- HBPM a dosis de riesgo alto, empezado 10-12 horas antes
- HBPM a dosis de riesgo moderado, empezado después de la intervención
- HBPM a dosis de riesgo alto, empezado después de la intervención

C1.- En el caso anterior, ¿Utilizaría algún método mecánico además de la HBPM?

- - Medias elásticas profilácticas (15-25 mm Hg en el tobillo)
  - Medias elásticas terapéuticas (30-40 mm Hg en el tobillo)
  - Compresión neumática intermitente
  - Vendaje elástico
  - No creo indicado ningún método físico en este caso

C2.- Para terminar, el paciente anterior evoluciona favorablemente y puede irse de alta en el 4º día postoperatorio. ¿Cuánto tiempo mantendría la profilaxis farmacológica en este caso?

- - Hasta el día del alta
  - Durante una semana tras la intervención
  - Durante 2 semanas tras la intervención
  - Durante 4 semanas tras la intervención

1. ¿Conoce o utiliza alguna de las siguientes guías para la prevención de la ETV postoperatoria? (puede marcar más de una)

- Guías de la Asociación Española de Cirujanos (AEC)
- Guías del ACCP
- Guías de la ASCO para cirugía oncológica
- Guías de la SECO para cirugía bariátrica
- Guías de ASECMA para cirugía mayor ambulatoria
- Guías locales de mi servicio/hospital

1. ¿Utiliza algunos de los siguientes métodos de estratificación de riesgo trombótico para el paciente quirúrgico? (Puede marcar más de uno)

- Modelo de Caprini
- Modelos de Rogers
- Esquema de ASECMA para cirugía ambulatoria
- Otros (especificar): ……………

1. Si utiliza algunos de los anteriores, ¿cómo los utiliza?

- En documento impreso
- Calculadora instalada en el sistema informático del hospital
- Calculadora en internet
- Calculadora en dispositivo móvil

Le agradecemos mucho su tiempo y colaboración. La información que nos ha suministrado servirá para conocer mejor el estado de la prevención de la enfermedad tromboembólica venosa postoperatoria en nuestro país y para mejorarla en lo posible.
